# Supplementary material for: Single-ion nano-features formed by a Li-containing block copolymer synthesized via PISA
Source: Royal Society of Chemistry journal article supplement (doi:10.1039/d3py00284e), 2023-01-01
Supplement: d3py00284e1.pdf [file d3py00284e1.pdf]

## Supporting Information

### Single-Ion Nano-features Formed by a Li-containing Block Copolymer Synthesized via PISA

Hamza Chourifa,<sup>a</sup> Chaimaa Gomri,<sup>a</sup> Belkacem Tarek Benkhaled,<sup>a</sup> Arnaud Chaix,<sup>a</sup> Karim Aissou,<sup>a</sup> and Mona Semsarilar<sup>\*,a</sup>

(a)

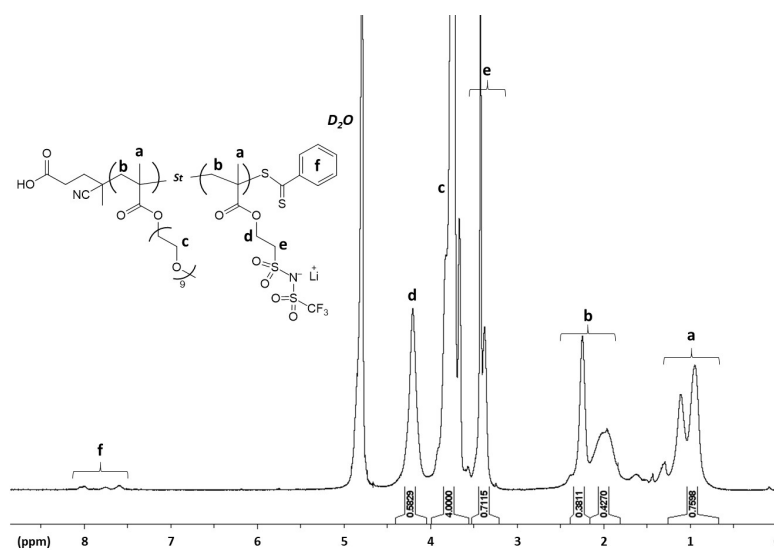

(b)

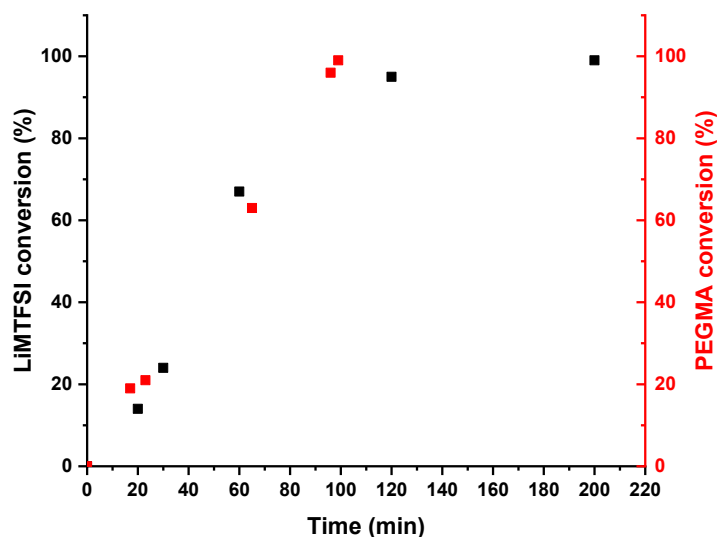

**Figure S1.** (a) <sup>1</sup>H NMR spectrum recorded for the copolymer of PEGMA<sub>27</sub>-co-PLiMTFSI<sub>31</sub> (b) Evolution of the conversion of LiMTFSI (black) and the PEGMA (red) using <sup>1</sup>H NMR (D<sub>2</sub>O, 400 MHz).

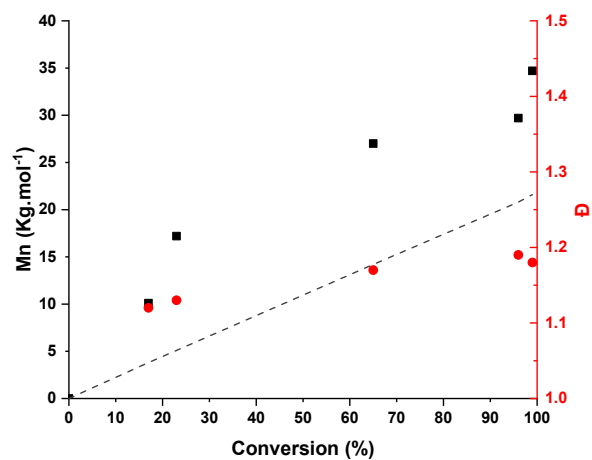

**Figure S2.** Evolution of number-average molecular weight and dispersity of the PEGMA<sub>27</sub>-co-PLiMTFSI<sub>31</sub>. The  $M_{n,th}$  was calculated according to the Equation 1.

(a)

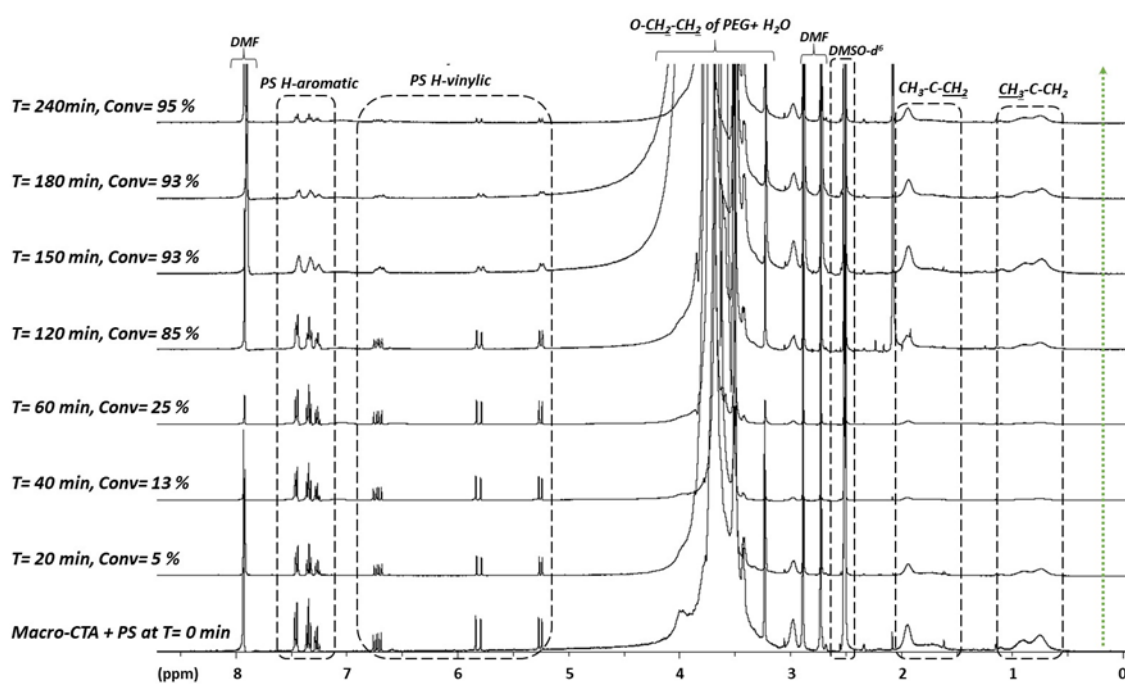

(b)

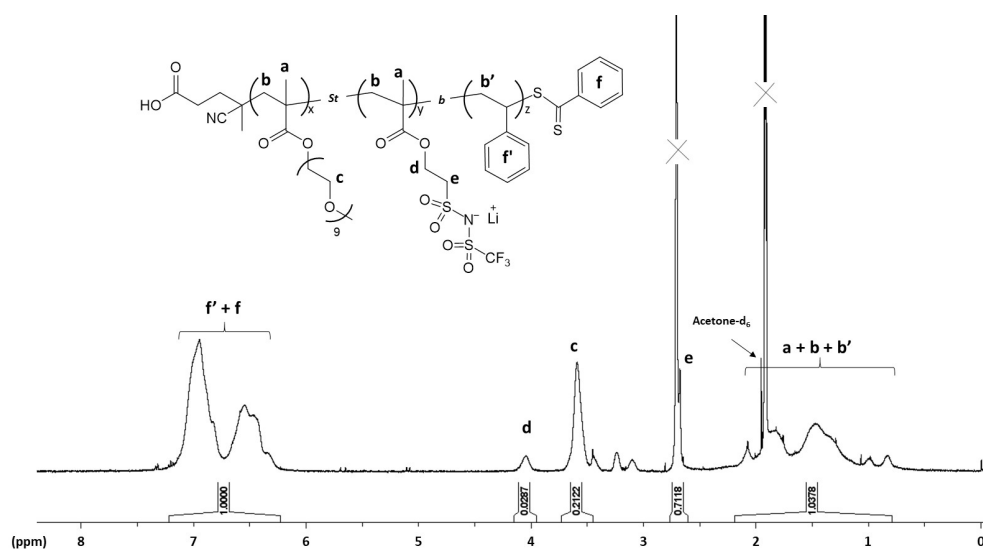

**Figure S3.** (a) <sup>1</sup>H NMR spectra recorded for the block copolymerization of P(PEGMA<sub>27</sub>-co-LiMTFSI<sub>31</sub>)-b-PS<sub>365</sub> as a function of time recorded in DMSO-*d*<sub>6</sub> (b) <sup>1</sup>H NMR spectrum recorded for the purified P(PEGMA<sub>27</sub>-co-LiMTFSI<sub>31</sub>)-b-PS<sub>365</sub> recorded in Acetone-*d*<sub>6</sub>.

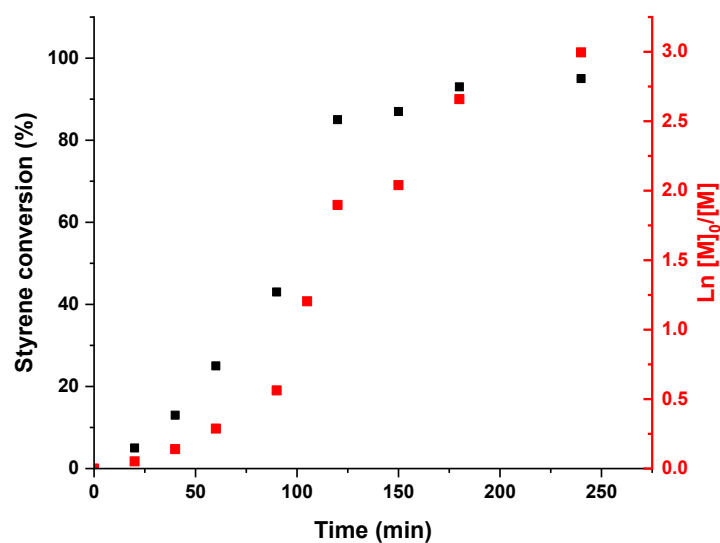

**Figure S4.** Styrene conversion vs time calculated using <sup>1</sup>H NMR (DMSO-*d*<sub>6</sub>).

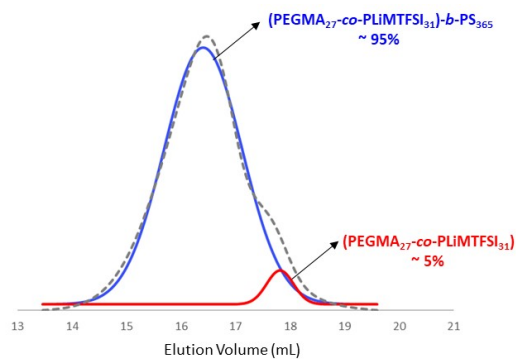

Fitting Results

| Peak Index | Peak Type | Area Intg | Area IntgP | Center Grvty | Max Height | FWHM    |
|------------|-----------|-----------|------------|--------------|------------|---------|
| 1          | Gaussian  | 281.48197 | 95.60276   | 16.4059      | 157.51276  | 1.67885 |
| 2          | Gaussian  | 12.94674  | 4.39724    | 17.81964     | 21.05856   | 0.57756 |

**Figure S5.** Deconvolution of SEC trace of P(PEGMA<sub>27</sub>-co-LiMTFSI<sub>31</sub>)-b-PS<sub>365</sub> (shown in Figure 2) and the corresponding peak analysis.

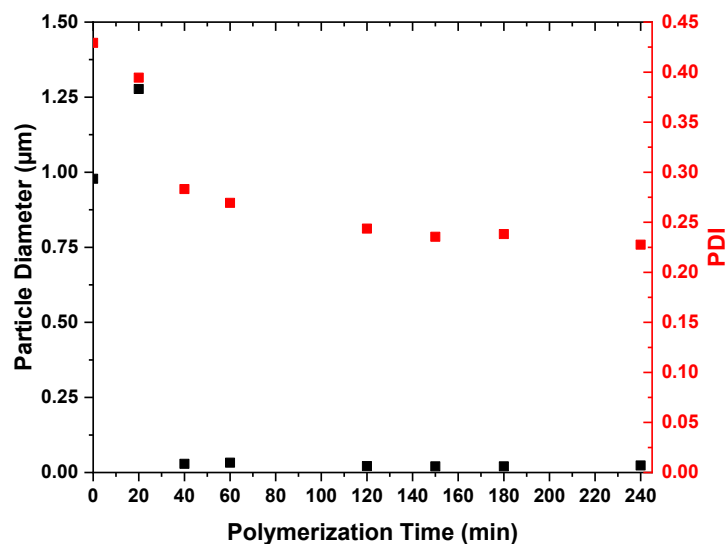

**Figure S6.** Evolution of the intensity-average particle diameter and polydispersities (PDI) with time as judged by dynamic light scattering for P(PEGMA<sub>27</sub>-co-LiMTFSI<sub>31</sub>)-b-PS<sub>z</sub>.

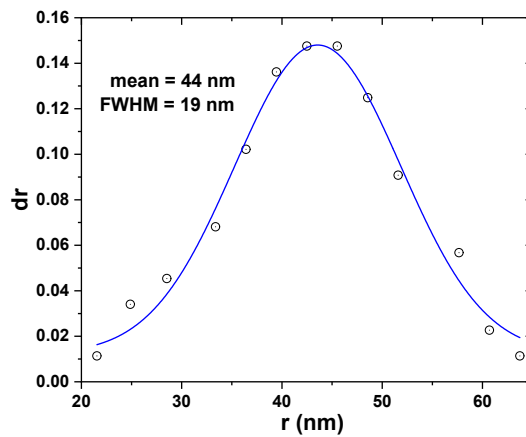

**Figure S7.** The nearest-neighbour distance distribution (NNDD) function obtained from the centre of mass of each P(PEGMA<sub>27</sub>-co-LiMTFSI<sub>31</sub>) nanodomain (full circles) is consistent with a short-range ordered structure having a mean nearest-neighbour distance of ~44 nm since the Gaussian distribution used to fit the data is width (FWHM ~19 nm).

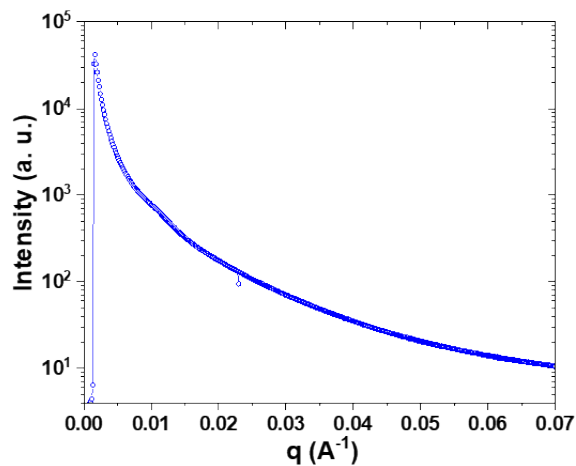

**Figure S8.** Featureless GISAXS pattern line-cut at the Yoneda peak position obtained for a solvent-annealed (3h, CHCl<sub>3</sub>) PS-*b*-P2VP-*b*-PEO film blended with 50 wt.% of P(PEGMA<sub>27</sub>-co-LiMTFSI<sub>31</sub>)-*b*-PS<sub>365</sub>.
